# Supplementary material
Source: publisher site journal article supplement (https://www.dovepress.com/article/371791)
Supplement: Supplementary file 1 [file get_supplementary_file.php]

**Supplementary Figure 1** Absolute number of confirmed diagnoses (J30.1, J30.2, J30.3 and J30.4) per quarter of the year 2019


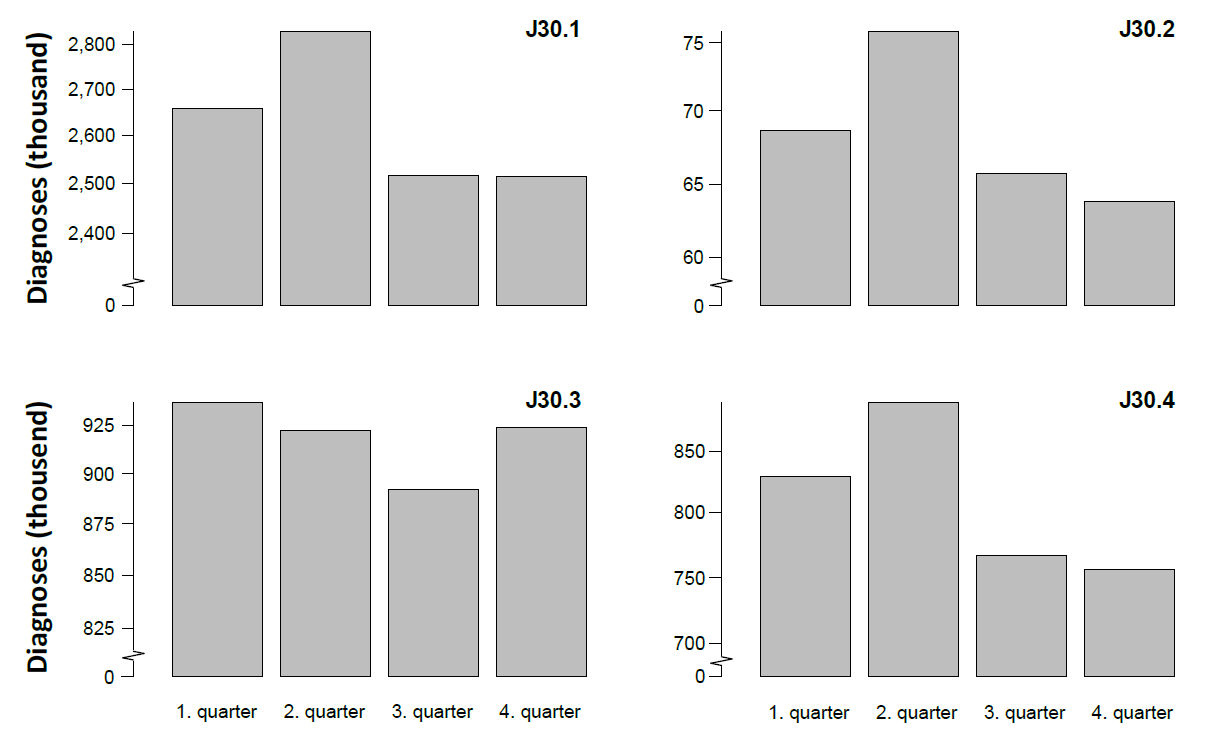


Notes: The scaling of y-axes of the four graphs is not identical and therefore not directly comparable. Source: Nationwide outpatient claims data encompassing all German statutory health insurances (SHI) according to § 295 SGB V

J30.1, allergic rhinitis due to pollen; J30.2, other seasonal allergic rhinitis; J30.3, other seasonal allergic rhinitis; J30.4, allergic rhinitis, unspecified.

**Supplementary Figure 2** Annual prevalence ratio of the age- and sex-standardized prevalence in western compared to eastern Germany (without Berlin) in the years 2010 to 2019


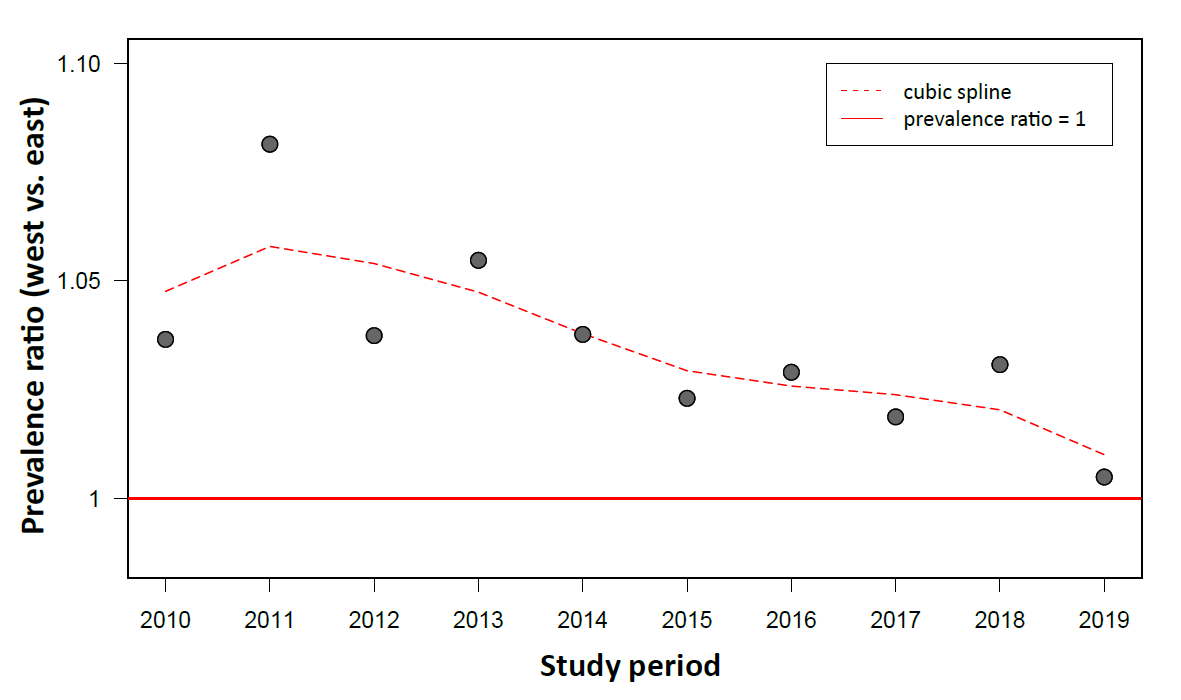


Source: Nationwide outpatient claims data encompassing all German statutory health insurances according to §295 SGB V
